# Supplementary material for: An ordered mesoporous carbon–silica hybrid for the detection of the antiviral drug ribavirin in clinical samples
Source: Royal Society of Chemistry journal article supplement (doi:10.1039/d4na00435c), 2024-01-01
Supplement: d4na00435c1.pdf [file d4na00435c1.pdf]

# Supplementary Information

**An ordered mesoporous carbon–silica hybrid for the detection of the antiviral drug ribavirin in clinical samples**

Amir Hosein Ali Naghian,<sup>a</sup> Zahra Hashemi<sup>a</sup>, Fereshteh Chekin<sup>\*b</sup> and Na'il Saleh<sup>\*c</sup>

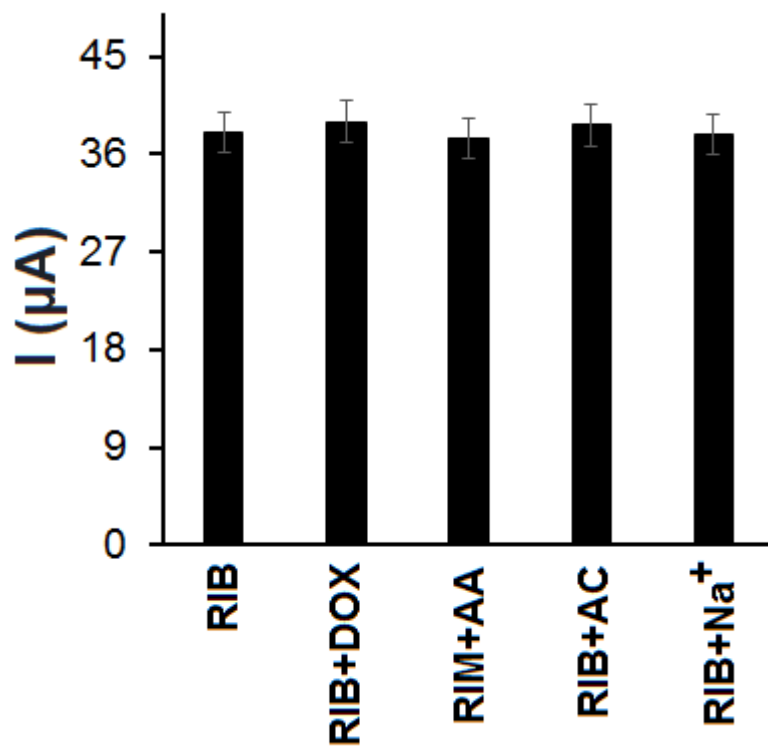

**Fig. S1.** Detected current of  $5 \mu\text{mol L}^{-1}$  RIB at  $\text{SiO}_2\text{-OMC/CPE}$  in PBS (pH 7.0) upon the addition of  $5 \mu\text{mol L}^{-1}$  doxorubicin (DOX), ascorbic acid (AA), acetaminophen (AC), and  $\text{Na}^+$ .
